# Supplementary material for: Nanoporous Co and N-Codoped Carbon Composite Derived from ZIF-67 for High-Performance Lithium-Sulfur Batteries
Source: MDPI journal article supplement (doi:10.3390/nano11081910), 2021-07-25
Supplement: s1 [file s1]

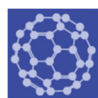

## Supporting information

# Nanoporous Co and N-Codoped Carbon Composite Derived from ZIF-67 for High-Performance Lithium-Sulfur Batteries

Songqiao Niu, Chenchen Hu, Yanyu Liu, Yan Zhao \* and Fuxing Yin \*

School of Materials Science and Engineering, Hebei University of Technology, Tianjin 300130, China; n2642275274@163.com (S.N.); h15364966537@163.com (C.H.); 18331525609@163.com (Y.L.)

\* Correspondence: yanzhao1984@hebut.edu.cn (Y.Z.); yinfuxing@hebut.edu.cn (F.Y.)

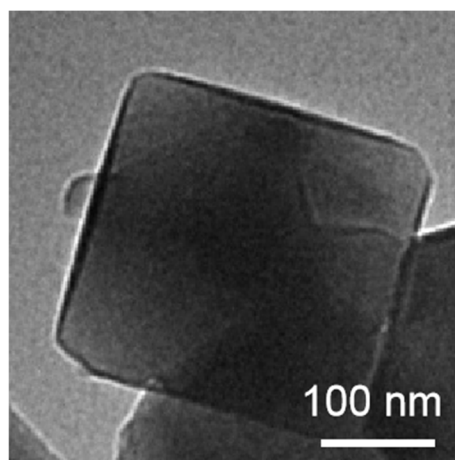

**Figure S1.** TEM image of ZIF-67 nanocubes.

**Citation:** Niu, S.; Hu, C.; Liu, Y.; Zhao, Y.; Yin, F. Nanoporous Co and N-Codoped Carbon Composite Derived from ZIF-67 for High-Performance Lithium-Sulfur Batteries. *Nanomaterials* **2021**, *11*, 1910. <https://doi.org/10.3390/nano11081910>

Academic Editor: Christian M. Julien

Received: 20 June 2021

Accepted: 14 July 2021

Published: 25 July 2021

**Publisher's Note:** MDPI stays neutral with regard to jurisdictional claims in published maps and institutional affiliations.

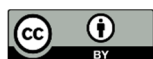

**Copyright:** © 2021 by the authors. Submitted for possible open access publication under the terms and conditions of the Creative Commons Attribution (CC BY) license (<http://creativecommons.org/licenses/by/4.0/>).

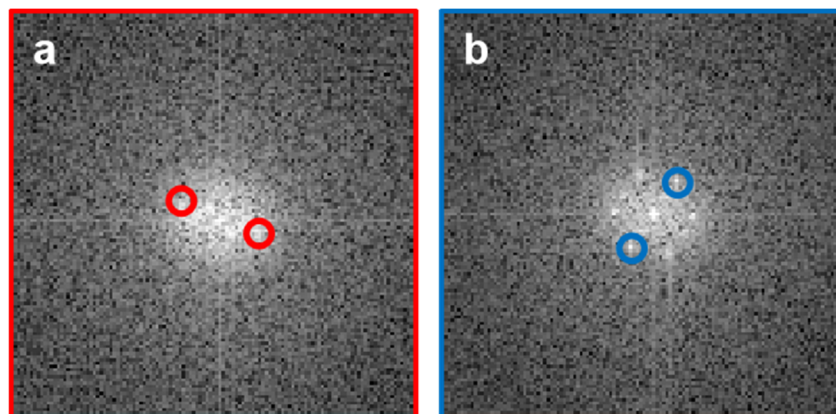

**Figure S2.** FFT patterns of (a) red square and (b) blue square in the HRTEM image of Co-NC600.

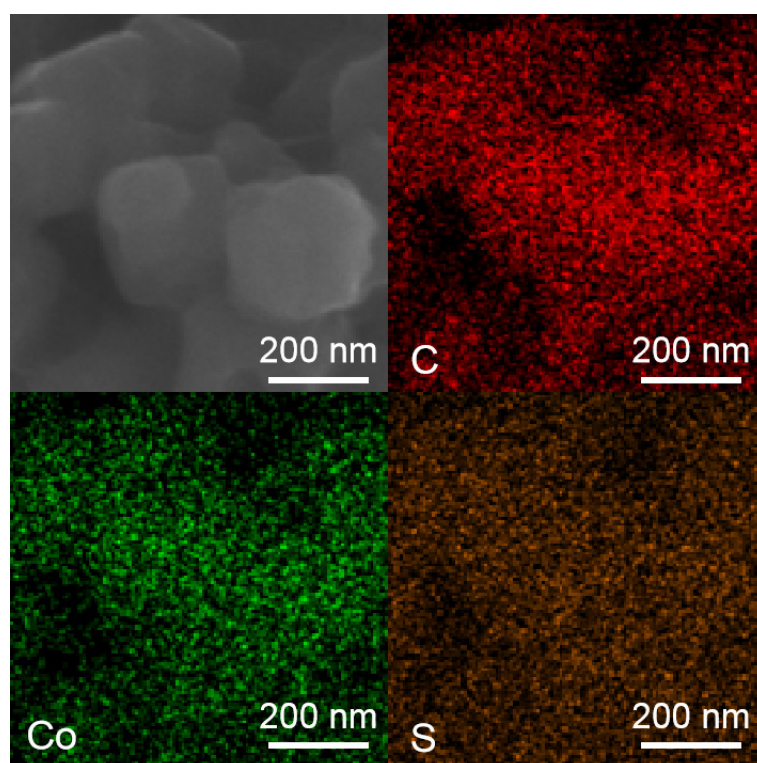

Figure S3. Elemental mapping of S/Co-NC600.

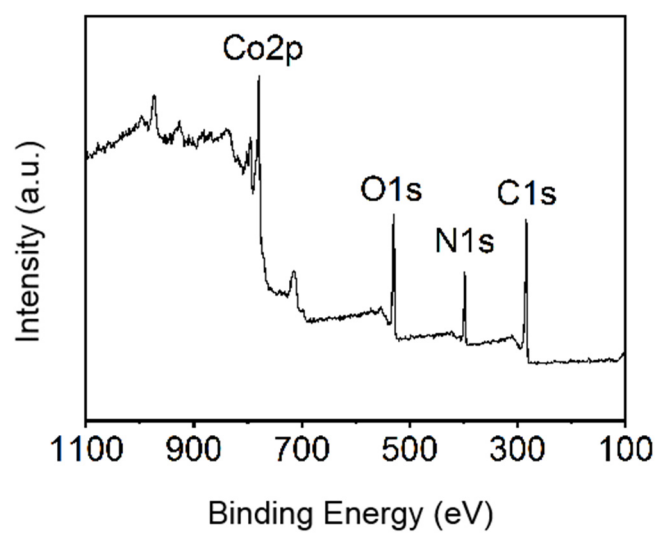

Figure S4. XPS spectra of S/Co-NC600 after annealed at 350 °C under Ar flow.

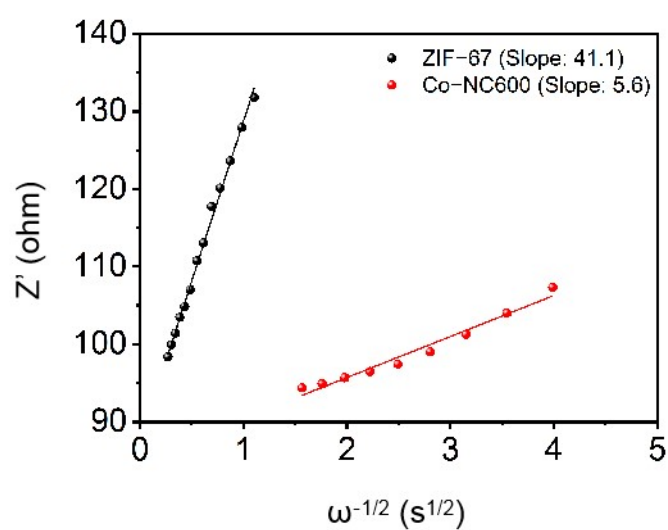

**Figure S5.** The liner fit between  $Z'$  and  $\omega^{-1/2}$  in the batteries with S/ZIF-67 and S/Co-NC600 electrodes.

**Table S1.** Electrode resistances data of S/ZIF-67 and S/Co-NC600 cathodes obtained from the equivalent circuit.

| Sulfur-carrier materials | S/ZIF-67 | S/Co-NC600 |
|--------------------------|----------|------------|
| $R_0$ ( $\Omega$ )       | 3.7      | 3.8        |
| $R_{ct}$ ( $\Omega$ )    | 72.2     | 27.9       |
| $Z_w$ ( $\Omega$ )       | 147.5    | 60.8       |
| CPE-P                    | 0.83     | 0.72       |
